# Supplementary material
Source: publisher figshare collection journal article supplement (https://gsapubs.figshare.com/ndownloader/files/23300762)
Supplement: Supplementary file 1 [file 23300762]

## Sheet: Sheet1
Analytical spot	207Pb/235U	2SE	206Pb/238U	2SE	LAM	206Pb-238U age (Ma)	±
11AM02F-1	0.69812	0.01903	0.08218	0.00096	0.0252233	509.1	5.74
11AM02F-2	0.06	0.00394	0.00876	0.00015	0.0190355	56.2	0.93
11AM02F-3	0.04695	0.00461	0.00737	0.00015	0.016269	47.3	0.98
11AM02F-4	0.04477	0.00337	0.00542	0.00011	0.0163205	34.8	0.7
11AM02F-5	0.1102	0.00304	0.01691	0.0002	0.0328947	108.1	1.28
11AM02F-6	1.54062	0.03803	0.1486	0.0017	0.0223508	893.1	9.53
11AM02F-7	0.08655	0.00497	0.01284	0.0002	0.0201207	82.3	1.28
11AM02F-8	0.15408	0.00816	0.01479	0.00025	0.0153186	94.6	1.56
11AM02F-9	0.03304	0.00356	0.00581	0.00013	0.0182584	37.4	0.81
11AM02F-10	0.18099	0.01179	0.02183	0.00036	0.0152672	139.2	2.29
11AM02F-11	0.05562	0.00911	0.00488	0.0002	0.0109769	31.4	1.28
11AM02F-12	0.12422	0.00752	0.01767	0.00028	0.018617	112.9	1.78
11AM02F-13	0.17658	0.00655	0.02659	0.00034	0.0259542	169.2	2.15
11AM02F-14	0.10258	0.00751	0.014	0.00025	0.0166445	89.6	1.56
11AM02F-15	0.82846	0.01778	0.09674	0.00109	0.0306524	595.3	6.43
11AM02F-16	0.05942	0.00618	0.00662	0.00017	0.013754	42.5	1.08
11AM02F-17	0.05631	0.00488	0.00747	0.00016	0.0163934	48	1
11AM02F-18	0.17447	0.00631	0.02527	0.00032	0.0253566	160.9	2.04
11AM02F-19	5.12943	0.12206	0.3044	0.00343	0.0140505	1713.1	16.94
11AM02F-20	0.14155	0.01116	0.01729	0.00035	0.015681	110.5	2.21
11AM02F-21	0.09113	0.00455	0.01271	0.00018	0.0197802	81.4	1.16
11AM02F-22	0.08126	0.01385	0.00993	0.00036	0.0129964	63.7	2.28
11AM02F-23	0.11538	0.00735	0.01483	0.00025	0.0170068	94.9	1.6
11AM02F-24	0.17035	0.01275	0.01509	0.00032	0.012549	96.5	2.03
11AM02F-25	0.05426	0.00374	0.00839	0.00014	0.0187166	53.8	0.91
11AM02F-26	0.07213	0.00231	0.01022	0.00013	0.0281385	65.6	0.83
11AM02F-27	0.0958	0.00674	0.01392	0.00024	0.0178042	89.1	1.55
11AM02F-28	0.26008	0.02252	0.02818	0.0006	0.0133215	179.1	3.79
11AM02F-29	0.0744	0.00503	0.00791	0.00015	0.0149105	50.8	0.97
11AM02F-30	0.10305	0.00591	0.01493	0.00024	0.0203046	95.6	1.5
11AM02M- 1	1.79486	0.0696	0.17775	0.0022	0.0158046	1054.7	12.02
11AM02M- 2	0.07697	0.01178	0.01397	0.00036	0.0152801	89.4	2.31
11AM02M- 3	0.09871	0.01078	0.01371	0.00033	0.0153061	87.8	2.12
11AM02M- 4	0.14093	0.01263	0.01915	0.0004	0.0158353	122.3	2.5
11AM02M- 5	2.03539	0.07043	0.19049	0.00229	0.0162573	1124	12.41
11AM02M- 6	0.05222	0.00268	0.00701	0.00011	0.0205224	45	0.68
11AM02M- 7	0.03793	0.0031	0.00523	0.00011	0.0177419	33.6	0.69
11AM02M- 8	0.07497	0.00844	0.01199	0.00028	0.0165877	76.8	1.79
11AM02M- 9	0.0617	0.00962	0.00786	0.00026	0.0135135	50.5	1.67
11AM02M- 10	0.94901	0.04919	0.11659	0.00159	0.0161618	710.9	9.18
11AM02M- 11	0.12737	0.04249	0.01793	0.00089	0.0104731	114.6	5.62
11AM02M- 12	0.07153	0.00755	0.00915	0.00022	0.0145695	58.7	1.4
11AM02M- 13	0.03653	0.00368	0.00565	0.00012	0.0163043	36.3	0.79
11AM02M- 14	0.18246	0.00816	0.02544	0.00035	0.0214461	162	2.23
11AM02M- 15	0.09196	0.00369	0.0136	0.00018	0.0243902	87.1	1.16
11AM02M- 16	0.0608	0.00193	0.00912	0.00011	0.0284974	58.5	0.73
11AM02M- 17	0.9734	0.02825	0.11045	0.00131	0.0231858	675.4	7.6
11AM02M- 18	0.0656	0.01029	0.00889	0.00027	0.0131195	57.1	1.75
11AM02M- 19	0.05937	0.00782	0.00777	0.00021	0.0134271	49.9	1.34
11AM02M- 20	0.08028	0.00414	0.01161	0.00018	0.0217391	74.4	1.12
11AM02M- 21	0.05639	0.0088	0.00876	0.00023	0.0130682	56.2	1.5
11AM02M- 22	0.04379	0.00556	0.00665	0.00017	0.0152878	42.7	1.1
11AM02M- 23	0.08454	0.01031	0.01235	0.00031	0.0150339	79.1	1.95
11AM02M- 24	0.10086	0.0032	0.01501	0.0002	0.03125	96.1	1.24
11AM02M- 25	0.18192	0.0191	0.02608	0.00056	0.0146597	166	3.5
11AM02M- 26	0.0329	0.00832	0.00551	0.00022	0.0132212	35.4	1.4
11AM02M- 27	4.5302	0.13785	0.29354	0.00363	0.0131665	1659.2	18.08
11AM02M- 28	0.74831	0.02776	0.08507	0.00113	0.020353	526.3	6.72
11AM02M- 29	0.04586	0.0022	0.00706	0.0001	0.0227273	45.4	0.67
11AM02M- 30	0.08553	0.01631	0.01583	0.00052	0.0159411	101.2	3.28
11AM02M- 31	0.11642	0.00493	0.01626	0.00023	0.0233266	104	1.47
11AM02M- 32	0.05746	0.01268	0.0068	0.00027	0.0106467	43.7	1.7
11AM02M- 33	0.09271	0.00636	0.01418	0.00025	0.0196541	90.7	1.58
11AM02M- 34	0.06471	0.0215	0.00843	0.00044	0.0102326	54.1	2.83
11AM02M- 35	0.05658	0.00823	0.00797	0.00023	0.0139733	51.2	1.44
11AM02M- 36	0.08898	0.01139	0.01357	0.00034	0.0149254	86.9	2.18
11AM02M- 37	0.06898	0.01075	0.00758	0.00026	0.012093	48.7	1.67
11AM02M- 38	0.10321	0.00756	0.01599	0.00029	0.0191799	102.3	1.84
11AM02M- 39	12.7114	0.90893	0.48065	0.00676	0.00371866	2530.1	29.42
11AM02M- 40	0.10973	0.01156	0.01386	0.00033	0.0142734	88.7	2.12
11AM02M- 41	7.24894	0.27029	0.33543	0.00424	0.00784343	1864.6	20.46
11AM02M- 42	9.17881	0.24926	0.42579	0.00524	0.0105111	2286.7	23.71
11AM02M- 43	0.08682	0.00452	0.01334	0.0002	0.0221239	85.4	1.29
11AM02M- 44	0.07284	0.01026	0.00899	0.00026	0.0126706	57.7	1.66
11AM02M- 45	0.07686	0.01104	0.00666	0.00022	0.00996377	42.8	1.41
11AM02M- 46	0.11115	0.00558	0.01589	0.00024	0.0215054	101.7	1.53
11AM02M- 47	0.77025	0.02505	0.09337	0.00122	0.0243513	575.5	7.17
11AM02M- 48	4.96339	0.14197	0.32123	0.00399	0.0140523	1795.7	19.49
11AM02M- 49	1.18417	0.05427	0.12555	0.00177	0.0163074	762.5	10.14
11AM02M- 50	1.13167	0.08448	0.13266	0.00226	0.0133759	803	12.89
11AM02M- 51	0.03768	0.00224	0.00578	9e-05	0.0200893	37.2	0.6
11AM02M- 52	0.79728	0.02937	0.10184	0.00136	0.0231529	625.2	7.93
11AM02M- 53	0.05318	0.00336	0.00811	0.00014	0.0208333	52	0.87
11AM02M- 54	0.06572	0.00723	0.00728	0.00019	0.0131397	46.8	1.24
11AM02M- 55	-0.12148	0.20847	0.01858	0.00201	0.00482084	118.7	12.73
11AM02M- 56	0.08912	0.00683	0.01387	0.00025	0.0183016	88.8	1.56
11AM02M- 57	0.04689	0.0058	0.00854	0.00021	0.0181034	54.8	1.33
11AM02M- 58	0.04545	0.00365	0.00708	0.00014	0.0191781	45.5	0.87
11AM02M- 59	0.05301	0.00551	0.00821	0.00019	0.0172414	52.7	1.19
11AM02M- 60	0.08869	0.00615	0.01358	0.00024	0.0195122	87	1.5
11AM02M- 61	1.28089	0.04614	0.13947	0.00183	0.0198309	841.7	10.35
11AM02M- 62	0.09629	0.00456	0.0147	0.00022	0.0241228	94.1	1.37
11AM02M- 63	0.11687	0.00998	0.01571	0.00031	0.0155311	100.5	1.96
11AM02M- 64	0.07431	0.01477	0.00713	0.00028	0.00947867	45.8	1.77
11AM02M- 65	0.0666	0.01055	0.00877	0.00027	0.0127962	56.3	1.72
11AM02M- 66	0.05432	0.0101	0.00647	0.00026	0.0128713	41.6	1.64
11AM02M- 67	0.04476	0.00435	0.00689	0.00015	0.0172414	44.3	0.99
11AM02M- 68	0.04188	0.00684	0.00688	0.00021	0.0153509	44.2	1.35
11AM02M- 69	0.09114	0.00956	0.01793	0.00038	0.0198745	114.5	2.41
11AM02M- 70	0.08811	0.01607	0.00821	0.00039	0.0121344	52.7	2.47
11AM02M- 71	1.4859	0.09711	0.15828	0.00236	0.0121512	947.2	13.16
11AM02M- 72	0.15581	0.02555	0.01492	0.00055	0.0107632	95.5	3.5
11AM02M- 73	0.14004	0.01626	0.01757	0.00046	0.0141451	112.3	2.94
11AM02M- 74	0.28936	0.01424	0.03769	0.00053	0.0186096	238.5	3.32
11AM02M- 75	1.87113	0.13947	0.17569	0.00271	0.00971535	1043.4	14.85
11AM02M- 76	0.07023	0.00704	0.00789	0.0002	0.0142045	50.6	1.25
11AM02M- 77	0.22753	0.00911	0.03284	0.00042	0.0230516	208.3	2.65
11AM02M- 78	0.06826	0.01641	0.00838	0.00042	0.0127971	53.8	2.68
11AM02M- 79	0.04798	0.00875	0.00701	0.00026	0.0148571	45	1.67
11AM02M- 80	0.13022	0.00513	0.01943	0.00025	0.0243665	124.1	1.59
11AM02M- 81	0.08803	0.01381	0.01315	0.00042	0.0152064	84.2	2.69
11AM02M- 82	0.05602	0.00486	0.00941	0.00018	0.0185185	60.4	1.14
11AM02M- 83	0.04331	0.01788	0.00887	0.00049	0.0137025	56.9	3.12
11AM02M- 84	0.04507	0.00232	0.00636	0.0001	0.0215517	40.9	0.61
11AM02M- 85	0.05479	0.00676	0.00868	0.00023	0.0170118	55.7	1.5
11AM02M- 86	0.74093	0.02556	0.09333	0.00112	0.0219092	575.2	6.61
11AM02M- 87	1.38149	0.06576	0.13442	0.00174	0.0132299	813	9.86
11AM02M- 88	0.19476	0.01292	0.0255	0.00043	0.0166409	162.3	2.73
11AM02M- 89	0.05199	0.02168	0.01186	0.00071	0.0163745	76	4.53
11AM02M- 90	0.04935	0.00574	0.00757	0.00019	0.0165505	48.6	1.23
11AM02M- 91	0.12145	0.00513	0.01692	0.00023	0.0224172	108.2	1.45
11AM02M- 92	0.06057	0.00392	0.00794	0.00014	0.0178571	51	0.89
11AM02M- 93	4.82964	0.17079	0.32173	0.00377	0.0110369	1798.2	18.41
11AM02M- 94	0.82284	0.06846	0.0948	0.00168	0.0122699	583.8	9.92
11AM02M- 95	0.81038	0.04591	0.09415	0.00136	0.0148116	580.1	8.04
11AM02M- 97	1.53435	0.06984	0.16046	0.00205	0.0146764	959.3	11.41
11AM02M- 96	0.04459	0.00608	0.00605	0.00018	0.0148026	38.9	1.12
11AM02M- 98	0.07999	0.01186	0.01057	0.00034	0.0143339	67.8	2.16
11AM02M- 99	0.12733	0.01825	0.01974	0.00054	0.0147945	126	3.43
11AM02M- 100	4.16104	0.13954	0.3002	0.00349	0.0125054	1692.3	17.32
11AM02M- 101	0.38397	0.02292	0.05204	0.00079	0.0172339	327	4.86
11AM02M- 102	0.07992	0.00658	0.01228	0.00023	0.0174772	78.7	1.48
11AM02M- 103	1.26073	0.11162	0.1246	0.00221	0.00989966	757	12.68
11AM02M- 104	0.04899	0.00659	0.00738	0.00022	0.016692	47.4	1.4
11AM02M- 105	2.09968	0.16091	0.17958	0.00277	0.0086073	1064.7	15.14
11AM02M- 106	0.06143	0.00981	0.00708	0.00027	0.0137615	45.5	1.72
11AM02M- 107	0.70326	0.01997	0.08635	0.00101	0.0252879	533.9	5.97
11AM02M- 108	0.44015	0.03526	0.06071	0.00109	0.0154566	380	6.65
11AM02M- 109	1.0622	0.04888	0.12583	0.00165	0.0168781	764	9.44
11AM02M- 110	0.06277	0.00609	0.00899	0.0002	0.0164204	57.7	1.3
11AM02M- 111	0.16272	0.01623	0.02623	0.00057	0.0175601	166.9	3.56
11AM02M- 112	0.82197	0.03371	0.09224	0.00117	0.0173539	568.8	6.93
11AM02M- 113	2.08133	0.10099	0.17894	0.00231	0.0114368	1061.2	12.63
11AM02M- 114	0.09785	0.02884	0.01314	0.00066	0.0114424	84.2	4.21
11AM02M- 115	0.1006	0.00706	0.01575	0.00027	0.0191218	100.7	1.7
11AM02M- 116	0.18057	0.01791	0.02578	0.00057	0.0159129	164.1	3.57
11AM02M- 117	0.11108	0.03134	0.01237	0.00077	0.0122846	79.2	4.91
11AM02M- 118	0.14153	0.014	0.02107	0.00046	0.0164286	134.4	2.89
11AM02M- 119	0.04844	0.01185	0.00607	0.00032	0.0135021	39	2.06
11AM02M- 120	3.41432	0.21474	0.24124	0.00325	0.00756729	1393.2	16.9
11AM02M- 121	0.79194	0.04176	0.09753	0.00132	0.0158046	599.9	7.74
11AM02M- 122	0.06185	0.01322	0.00814	0.00033	0.0124811	52.3	2.09
11AM02M- 123	0.18995	0.01816	0.01105	0.00035	0.00963656	70.9	2.23
11AM02M- 124	0.69065	0.02531	0.08616	0.00103	0.0203477	532.8	6.1
11AM02M- 125	6.50066	0.39983	0.35074	0.0045	0.00562739	1938.1	21.5
11AM02M- 126	0.04878	0.0064	0.00663	0.00019	0.0148438	42.6	1.24
11AM02M- 127	0.79202	0.03401	0.0963	0.00121	0.0177889	592.7	7.1
11AM02M- 128	0.04025	0.01515	0.00629	0.0004	0.0132013	40.4	2.56
11AM02M- 129	0.12599	0.03207	0.01303	0.00073	0.0113814	83.5	4.66
11AM02M- 130	0.04487	0.00497	0.00625	0.00015	0.0150905	40.2	0.97
11AM02M- 131	0.80922	0.04627	0.08836	0.00127	0.0137238	545.8	7.52
